# Supplementary material for: A Reference Genome Assembly of the Bobcat, Lynx rufus
Source: PubMed Central journal article supplement — J Hered. 2022 Jun 13;113(6):615–23. doi: 10.1093/jhered/esac031 (PMC9709964; doi:10.1093/jhered/esac031), 2022-06-13
Supplement: esac031_suppl_supplementary_figure.pdf [file esac031_suppl_supplementary_figure.pdf]

1 Lin\_SupMat\_figure\_Bobcat reference genome\_R2\_JHered.pdf

2 **Supplementary Figure for**

3 ***Title:*** A Reference Genome Assembly of the Bobcat, *Lynx rufus*

4 ***Author names:*** Meixi Lin<sup>1,C</sup>; Merly Escalona<sup>2</sup>; Ruta Sahasrabudhe<sup>3</sup>; Oanh Nguyen<sup>3</sup>; Eric

5 Beraut<sup>4</sup>; Michael R. Buchalski<sup>5,\*</sup>; Robert K. Wayne<sup>1,\*</sup>

6 <sup>C</sup>: Corresponding author

7 \*: Contributed equally

8 ***Table of Contents:***

9 **Supplementary Figure 1.** The Omni-C contact map for the alternate genome assembly

10 (GCA\_022079275.1) generated with PretextSnapshot.

11

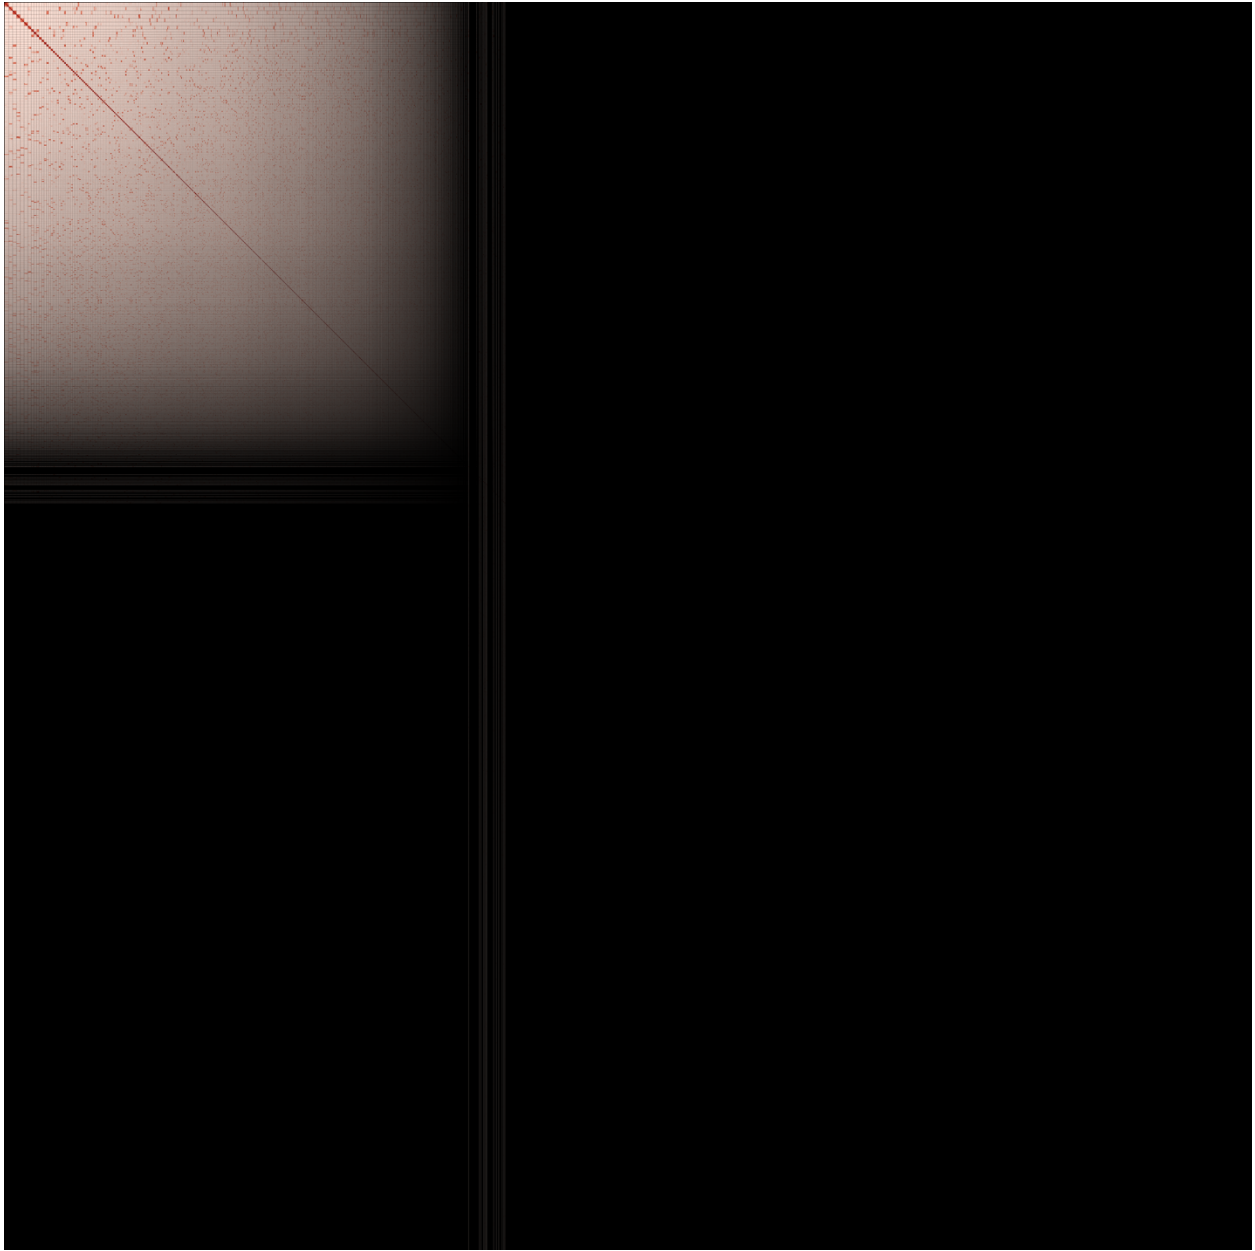

12

13 **Supplementary Figure 1.** The Omni-C contact map for the alternate genome assembly  
14 (GCA\_022079275.1) generated with PretextSnapshot. Omni-C contact maps translate proximity  
15 of genomic regions in 3-D space to contiguous linear organization. Each cell in the contact map  
16 corresponds to sequencing data supporting the linkage (or join) between two of such regions.  
17 Scaffolds are separated by black lines and higher density corresponds to higher levels of  
18 fragmentation. This alternate assembly consists of haplotigs (contigs of clones with the same  
19 haplotype) in heterozygous regions and is not as complete and more fragmented than the primary  
20 assembly (GCA\_022079265.1; Figure 2C).

21
